# Supplementary material for: Construction and adsorption properties of microporous tetrazine-based organic frameworks
Source: Royal Society of Chemistry journal article supplement (doi:10.1039/c1ra00571e), 2011-11-09
Supplement: c1ra00571e.pdf [file c1ra00571e.pdf]

## *Electronic Supporting Information for*

# **Constuction and Adsorption Properties of Microporous Tetrazine-Based Organic Frameworks**

Da-Shuai Zhang, Ze Chang, Ying-Bin Lv, Tong-Liang Hu, Xian-He Bu\*

### **Experimental procedures**

**Chemicals and Physical Measurements.** All the chemicals used for synthesis were commercially available and used as received. Tetrakis(4-cyanatophenyl)methane (TCPM) was prepared according to the reported methods.<sup>1</sup> Solid-state NMR experiment was carried on a Varian Infinityplus-400 wide-bore (89 mm) NMR spectrometer at a proton frequency of 399.7 MHz using a 4 mm double-resonance HX CP/MAS NMR probe. IR spectra were measured on a Tensor 27 OPUS (Bruker) FT-IR spectrometer with KBr pellets. Thermogravimetric analyses (TGA) was carried out on a Rigaku standard TG-DTA analyzer with a heating rate of 10 °C min<sup>-1</sup> from room temperature to 800 °C. Elemental analyses (C, H, and N) were performed on a Perkin-Elmer 240C analyzer. The X-ray powder diffraction spectra (XRPD) was recorded on a Rigaku D/Max-2500 diffractometer at 40 kV, 100mA for a Cu-target tube and a graphite. Scanning electron microscope (SEM) images were recorded using a Hitachi S4800 Type II FE-SEM at 3.0 kV. Gas adsorption measurements were performed using an ASAP 2020 M gas adsorption analyzer.

**Synthesis of the TzFs.** These materials were obtained from TCPM by similar procedures, so only the synthesis of TzF-1 will be described in detail and other details are listed in Table S1. Also, the possible scheme of these reactions is shown in Scheme S1<sup>2</sup>.

**Synthesis of TzF-1.** Tetrakis(4-cyanatophenyl)methane (300 mg, 0.71 mmol) and sulfur (0.3 g, 9.37 mmol) were placed in a 25 mL round flask, followed by the addition of hydrazine (5 mL). The reaction mixture was magnetically stirred and heated to reflux for 4 days. After cooling, the solvent was removed by filtration and the resulting light yellow solid was washed by hydrazine, water and ethanol. Subsequent suspension of the solid into a mixture of glacial acetic acid (60 mL) and water (40 mL) was cooled to 0 °C, and followed by the addition of sodium nitrite (1.81 g) in cold water (5 mL), the reaction mixture turned red-violet in color. The mixture was then filtrated and collected after soxhlet extracted over night with tetrahydrofuran (THF) (yield: 65% ~ 75%).

1. M. Grimm, B. Kirste and H. Kurreck, *Angewandte Chemie*, 1986, **98**, 1095-1099.
2. G. Clavier and P. Audebert, *Chemical Reviews*, 2010, **110**, 3299-3314.

**Table S1.** Details for the synthesis of the tetrazine-based framework materials

| TzFs  | Hydrazine/mL | Sulphur/g | Reaction time | Temperature | Added solvent               |
|-------|--------------|-----------|---------------|-------------|-----------------------------|
| TzF-1 | 5            | 0.3       | 4 days        | reflux      | none                        |
| TzF-2 | 5            | 0.3       | 2 days        | reflux      | THF 10mL                    |
| TzF-3 | 10           | 0.8       | 4 days        | reflux      | THF 10mL<br>ethanol 10ml    |
| TzF-4 | 6            | 0.4       | 4 days        | reflux      | 1,4-dioxane 5mL<br>DMSO 5mL |
| TzF-5 | 5            | 0.4       | 3 days        | 60°C        | DMSO 10mL                   |
| TzF-6 | 16           | 0.6       | 3 days        | 90°C        | none                        |
| TzF-7 | 18           | 0.6       | overnight     | 90°C        | Ethane-1,2-diol 10mL        |

**Table S2.** Resulting BET and Langmuir surface areas and pore volume of the obtained materials

| TzFs  | $S_{\text{BET}}/\text{m}^2\cdot\text{g}^{-1}$ | $S_{\text{Langmuir}}/\text{m}^2\cdot\text{g}^{-1}$ | H-K Maxium Pore Volume/<br>$\text{cm}^3\cdot\text{g}^{-1}$ |
|-------|-----------------------------------------------|----------------------------------------------------|------------------------------------------------------------|
| TzF-1 | 458                                           | 611                                                | 0.50                                                       |
| TzF-2 | 514                                           | 682                                                | 0.31                                                       |
| TzF-3 | 233                                           | 308                                                | 0.14                                                       |
| TzF-4 | 171                                           | 227                                                | 0.12                                                       |
| TzF-5 | 348                                           | 468                                                | 0.49                                                       |
| TzF-6 | 444                                           | 593                                                | 0.46                                                       |
| TzF-7 | 571                                           | 764                                                | 1.09                                                       |

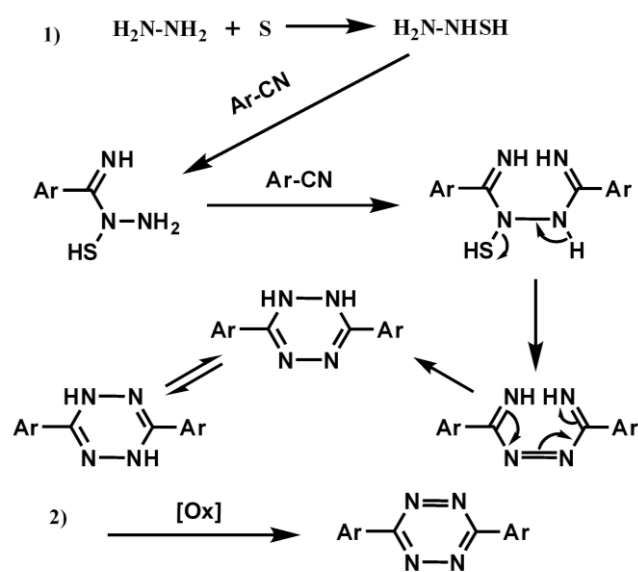

**Scheme S1** The possible mechanism for the formation of TzFs.

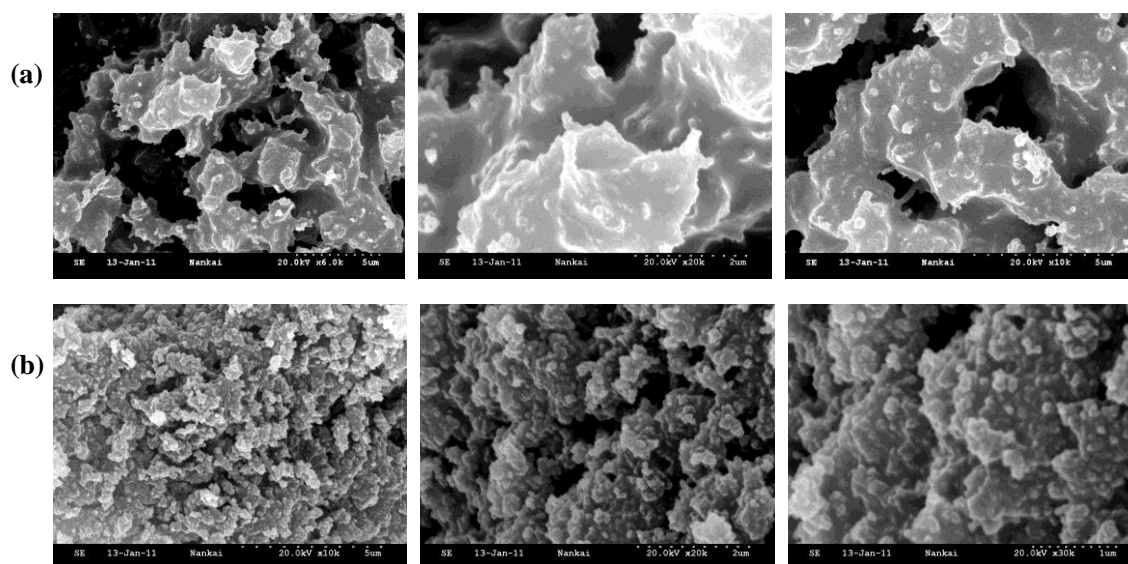

**Figure S1.** SEM images for the TzFs: (a) TzF-6 showing an amorphous forms; (b) TzF-7 displaying a more loose surface.

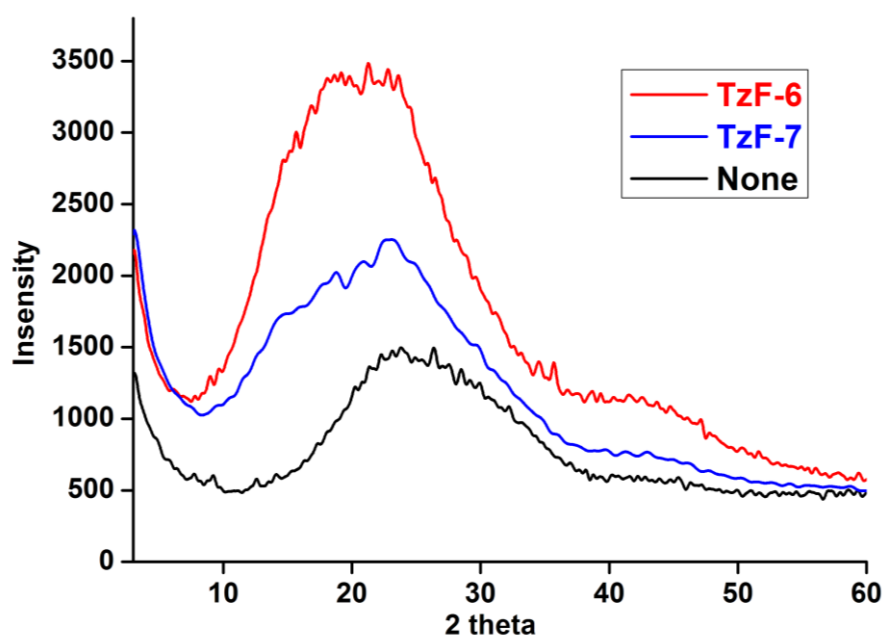

**Figure S2.** X-ray powder diffraction patterns of TzF-7 (blue), TzF-6 (red), and an empty pan (black).

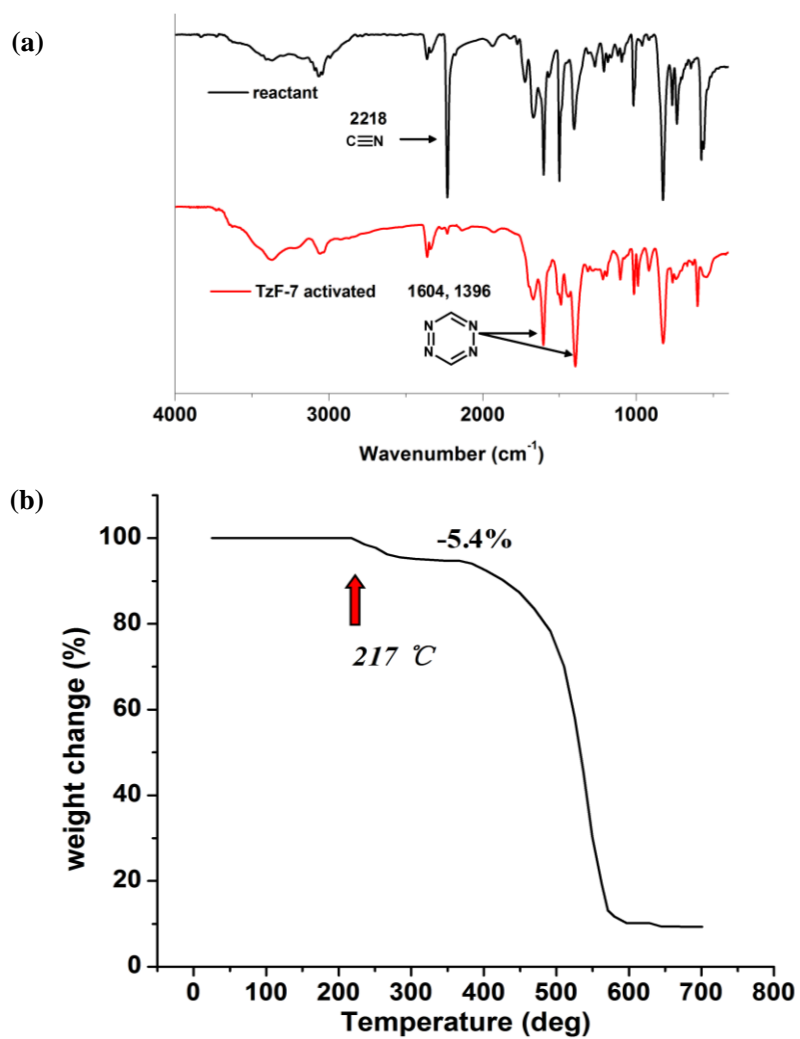

**Figure S3** (a) FT-IR spectra of the reactant TCPM and the TzF-7 prepared from TCPM; (b) TGA curve of TzF-1 under air atmosphere and heating rate of 10 °C min<sup>-1</sup>.

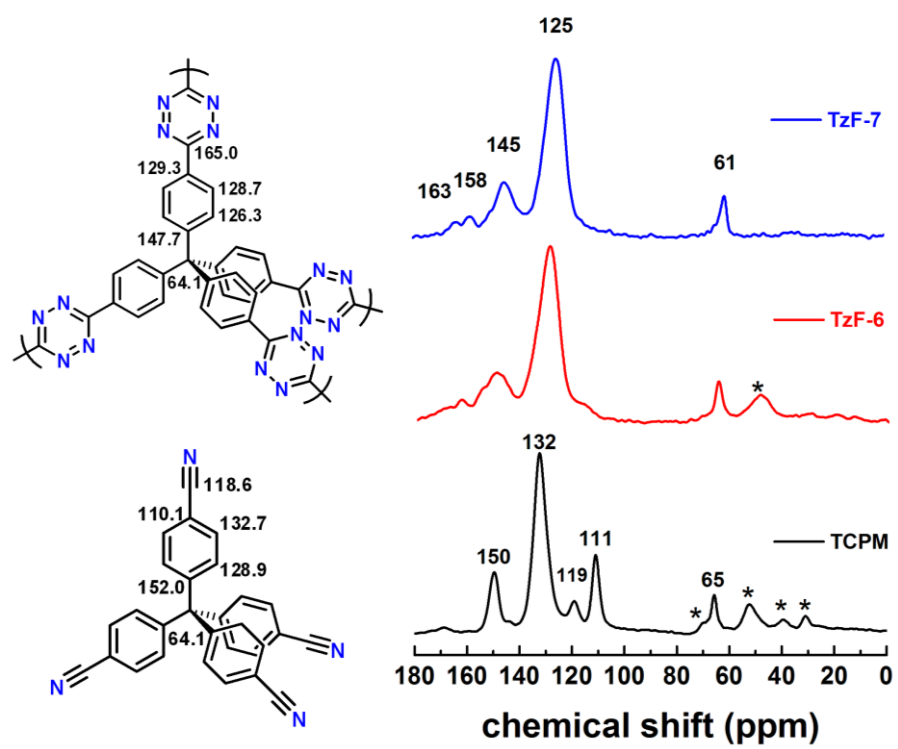

**Figure S4** Solid  $^{13}\text{C}$  NMR spectra of TCPM (black), TzF-6 (red) and TzF-7 (blue). Asterisks denote spinning sidebands.

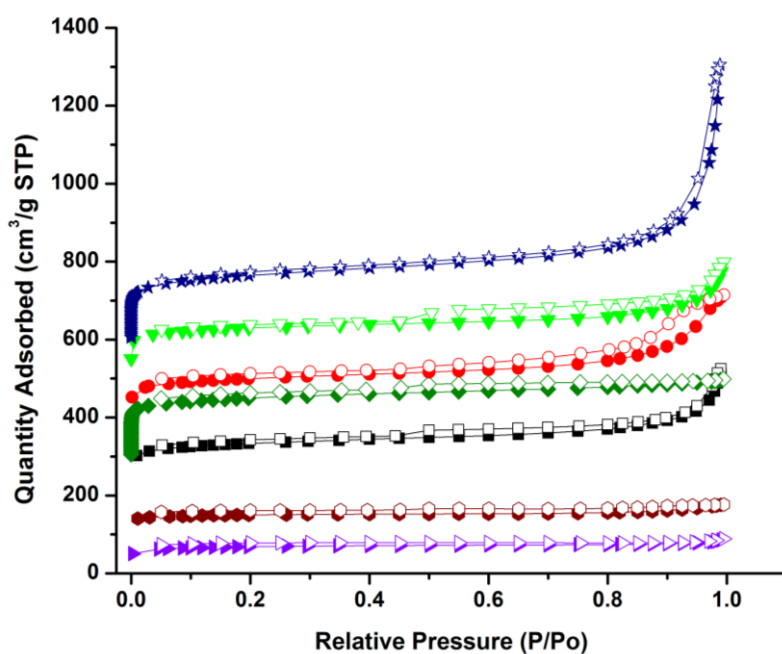

**Figure S5** N<sub>2</sub> adsorption and desorption isotherms of the materials obtained at 77 K: TzF-1 (black), TzF-2 (olive), TzF-3 (violet), TzF-4 (wine), TzF-5 (red), TzF-6 (green) and TzF-7 (navy). For clarity, the curves for TzF-7, TzF-6, TzF-5, TzF-2 and TzF-1 were shifted vertically by 600, 500, 400, 300 and 200 cm<sup>3</sup>g<sup>-1</sup>, respectively.



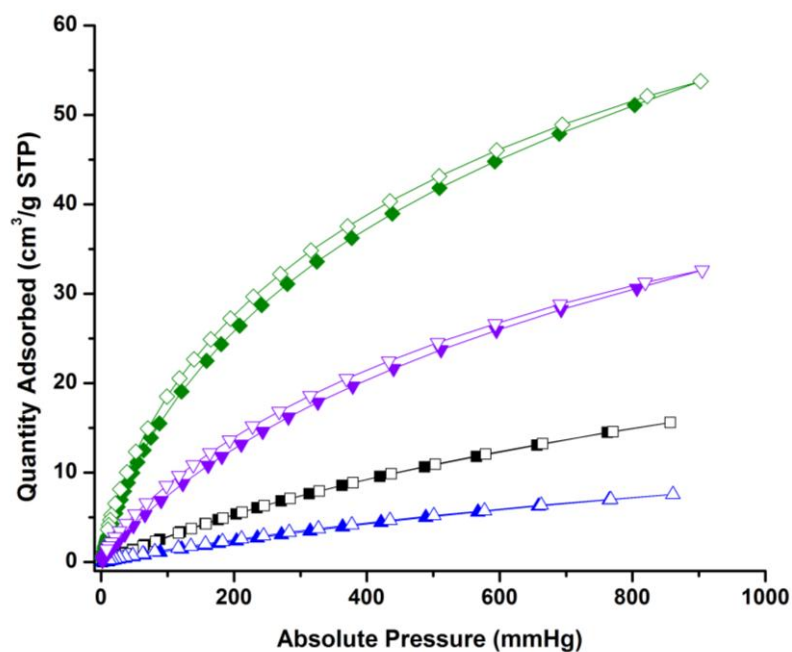

**Figure S6** CH<sub>4</sub> adsorption and desorption isotherms of TzF-7 at 273 K (black) and 303 K (blue); CO<sub>2</sub> adsorption and desorption isotherms of TzF-7 at 273 K (olive) and 303 K (violet).

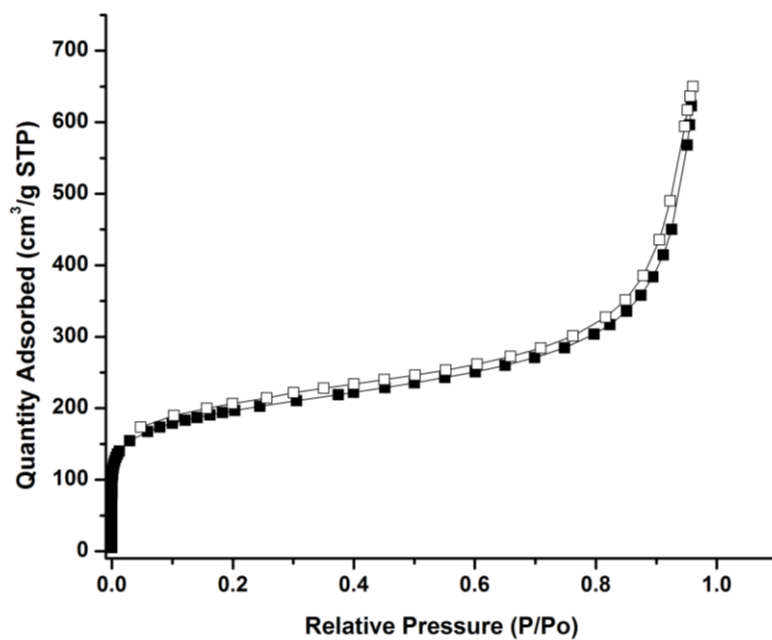

**Figure S7** O<sub>2</sub> adsorption and desorption isotherms of TzF-7 at 77 K.

### Estimation of adsorption enthalpies

A Virial Method model was used for calculating the isosteric enthalpies of adsorption.

The following equation is used for this method.

$$\ln(n/p) = A_0 + A_1n + A_2n^2 \dots$$

Where  $n$  is the amount adsorbed,  $p$  is the pressure and  $A_0$  and  $A_1$  are constants.  $A_0$  is related to adsorbate-adsorbent interactions, and  $A_1$ , adsorbate-adsorbate interactions. These equations were used interpolate between isotherm points to obtain pressures for specific amounts adsorbed. Henry's Law constant ( $K_H$ ) is equal to  $\exp(A_0)$ . The van't Hoff isochore was used to determine the isosteric enthalpy of adsorption at specific surface coverages. At low surface coverage  $A_2$  and higher terms can be neglected. The isosteric enthalpies of adsorption at zero surface coverage were obtained from the  $A_0$  values.

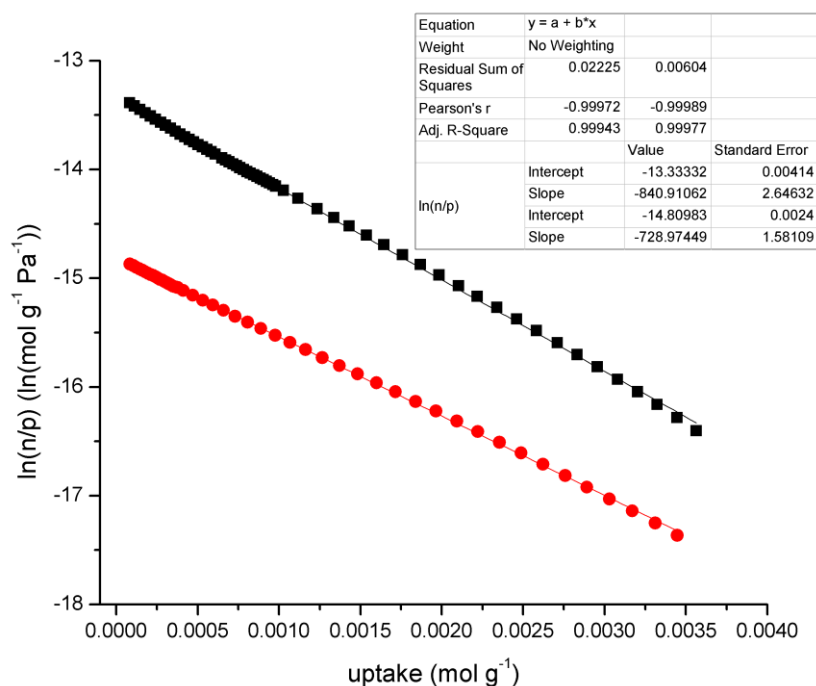

Figure S8 Analysis of H<sub>2</sub> adsorption data of TzF-6 using Virial method.

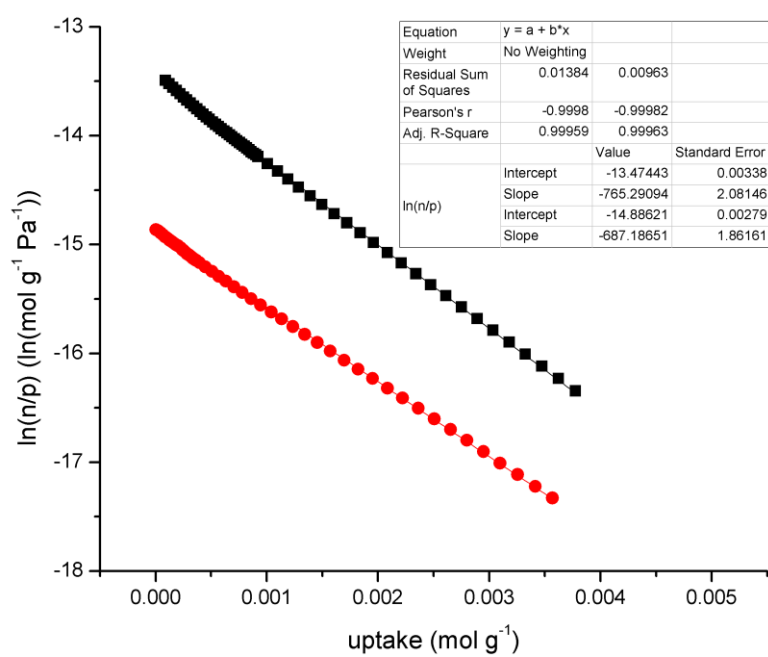

**Figure S9** Analysis of H<sub>2</sub> adsorption data of TzF-7 using Virial Method.
